# Supplementary material
Source: publisher site journal article supplement (https://www.dovepress.com/article/442138)
Supplement: Supplementary file 1 [file get_supplementary_file.php]

Supplementary Table 1 Characteristics of the critically ill older adult patients in the original training cohort.

| **Variables** | Survivors  (n = 8420) | Non-survivors  (n = 1813) | ***p*-value** |
| --- | --- | --- | --- |
| **Age, years, median [IQR]** | 79.0 [72.0;86.0] | 81.0 [74.0;87.0] | <0.001 |
| **Sex, n (%)** |  |  | 0.692 |
| Female | 4236 (50.3%) | 922 (50.9%) |  |
| Male | 4184 (49.7%) | 891 (49.1%) |  |
| **GCS score, median [IQR]** | 15.0 [14.0;15.0] | 15.0 [10.0;15.0] | <0.001 |
| **Comorbidities, n (%)** |  |  |  |
| Malignant cancer | 1223 (14.5%) | 358 (19.7%) | <0.001 |
| Sepsis | 3966 (47.1%) | 1157 (63.8%) | <0.001 |
| **Medical treatment, n (%)** |  |  |  |
| Mechanical ventilation | 1098 (13.0%) | 842 (46.4%) | <0.001 |
| Vasoactive agent | 1432 (17.0%) | 821 (45.3%) | <0.001 |
| **Laboratory test results, median [IQR]** |  |  |  |
| White blood cell count, 109/L | 9.50 [7.10;12.9] | 11.9 [8.50;16.7] | <0.001 |
| Hemoglobin, g/dL | 10.8 [9.30;12.1] | 10.6 [9.10;12.1] | 0.071 |
| Platelet, 109/L | 199 [150;259] | 194 [142;264] | 0.048 |
| Sodium, mmol/l | 139 [136;141] | 139 [136;142] | 0.626 |
| Chloride, mmol/L | 104 [101;108] | 104 [100;108] | 0.652 |
| Potassium, mmol/l | 4.00 [3.70;4.40] | 4.20 [3.70;4.60] | <0.001 |
| Creatinine, mg/dL | 1.00 [0.80;1.50] | 1.20 [0.80;2.00] | <0.001 |
| International normalized ratio | 1.20 [1.10;1.50] | 1.30 [1.10;1.70] | <0.001 |

Supplementary Table 2 Characteristics of the external validation cohort used for performance validation .

| **Variables** | Survivors  (n = 144) | Non-survivors  (n = 133) |
| --- | --- | --- |
| **Age, years, median [IQR]** | 76.0 [70.0;80.0] | 75.0 [68.0;82.0] |
| **Sex, n (%)** |  |  |
| Female | 52 (36.1%) | 43 (32.3%) |
| Male | 92 (63.9%) | 90 (67.7%) |
| **GCS score, median [IQR]** | 9.00 [6.00;15.0] | 5.00 [3.00;8.00] |
| **Malignant cancer, n (%)** | 12 (8.33%) | 12 (9.02%) |
| **Medical treatment, n (%)** |  |  |
| Mechanical ventilation | 125 (86.8%) | 129 (97.0%) |
| Vasoactive agent | 27 (18.8%) | 38 (28.6%) |
| **Laboratory test results, median [IQR]** |  |  |
| White blood cell count, 109/L | 10.8 [8.17;14.3] | 11.8 [8.32;17.1] |
| Potassium, mmol/l | 4.16 [3.86;4.59] | 4.33 [3.83;4.71] |
| Creatinine, mg/dL | 0.89 [0.68;1.20] | 1.19 [0.78;1.75] |
